# Supplementary material for: Quality of Life and Psychosocial Well-Being among Intersex-Identifying Individuals in Puerto Rico: An Exploratory Study
Source: MDPI journal article supplement (doi:10.3390/ijerph20042899), 2023-02-07
Supplement: s1 [file s1]

Supplementary Material:

a.

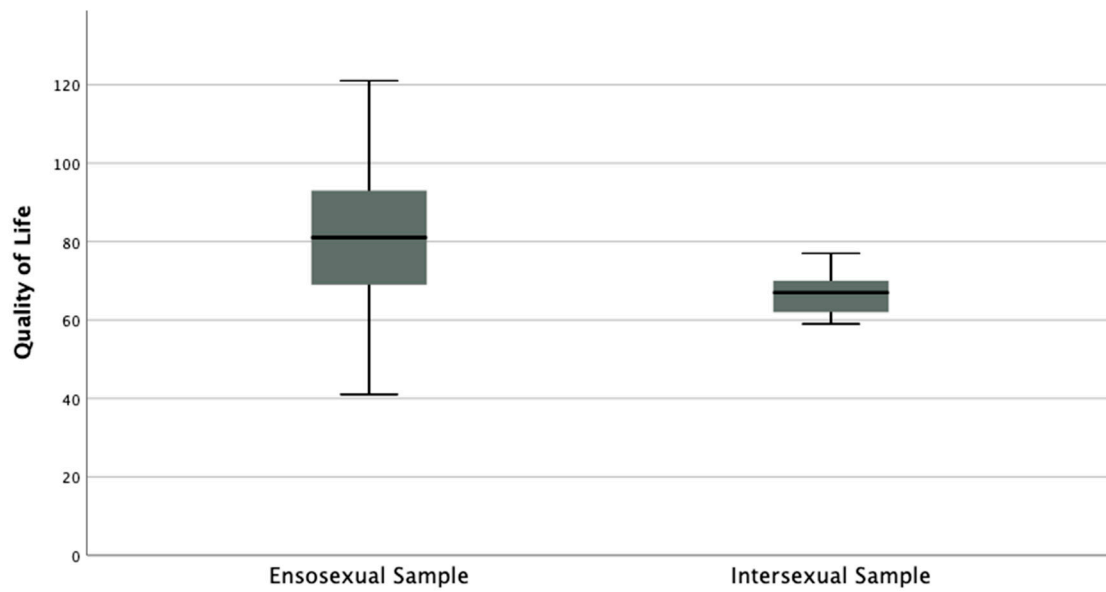

b.

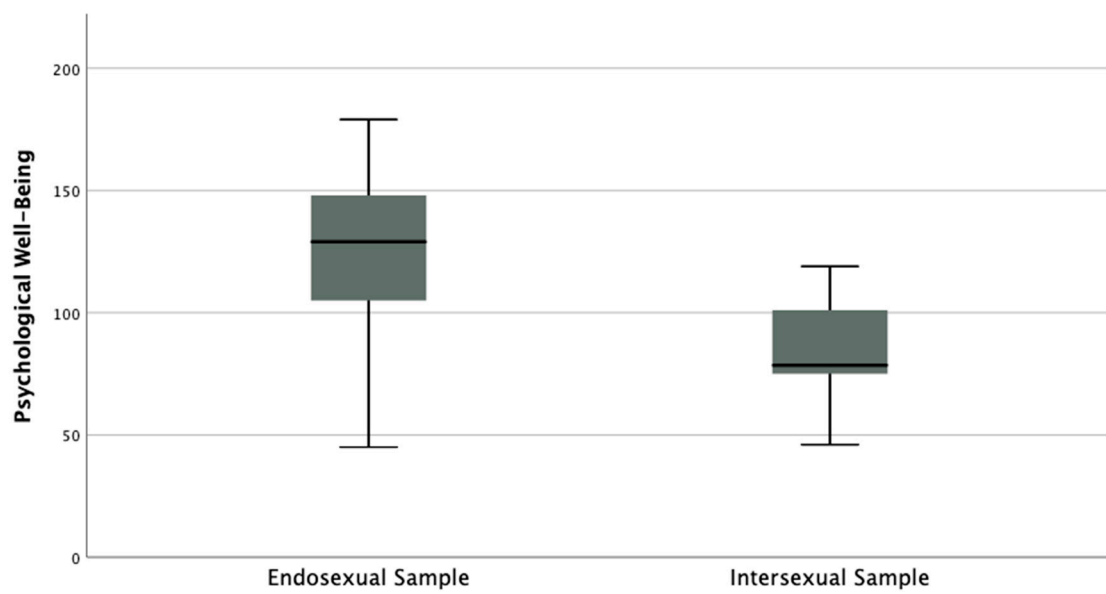

C.

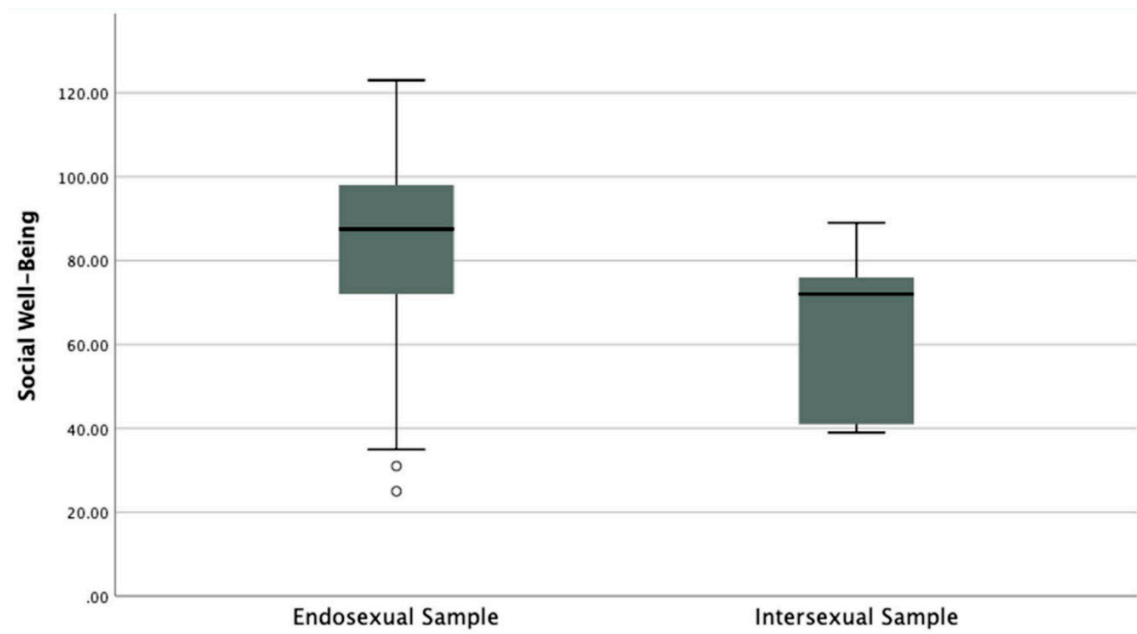

**Figure S1:** Box Plots and Whiskers for Quality-of-Life (a), Psychological Well-Being (b) and Social Well-Being (c).
